# Supplementary material for: Wound-Healing Properties of Green (Using Lawsonia Inermis Leaf Extract) and Chemically Synthesized Zno Nanoparticles in Albino Rats
Source: Research Square preprint supplement (doi:10.21203/rs.3.rs-639379/v1), 2021-07-06

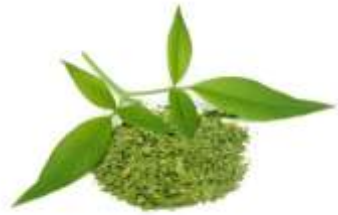

Maceration  
Extraction

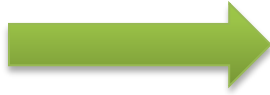

*Lawsonia inermis* leaves

*Lawsonia inermis* leaves  
methanolic extract

| Phytochemical            | Test                  | Result |
|--------------------------|-----------------------|--------|
| Alkaloids                | Mayer's test          | +      |
| Carbohydrates            | Molish test           | -      |
| Flavonoids               | Alkaline reagent test | +      |
| Saponins                 | Froth formation test  | +      |
| Tannins                  | Gelatin test          | -      |
| Proteins                 | Warming test          | +      |
| Triterpenoids            | Salkowski test        | +      |
| Glycosoides              | Borntrager's test     | +      |
| (+)= present (-)= absent |                       |        |

Phytochemical  
Screening

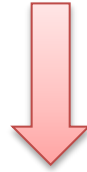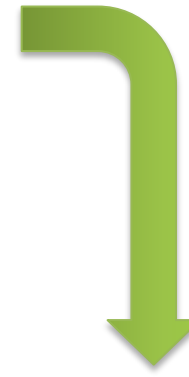

Nanotechnology

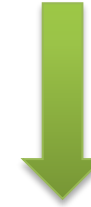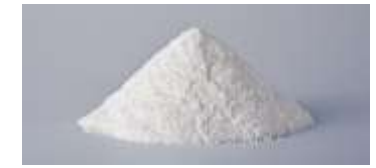

ZnO

Green ZnO-NPs

Chemical ZnO-NPs

Characterization  
XRD  
FTIR  
HRTEM

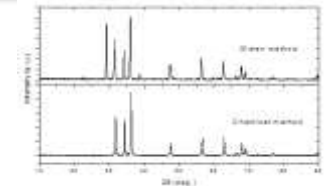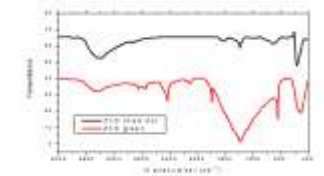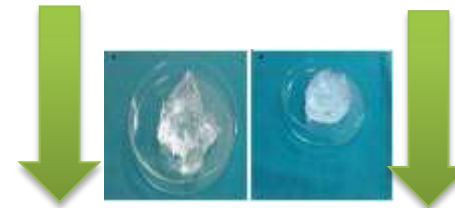

Gel Preparation

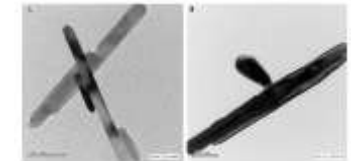

Experimental Design

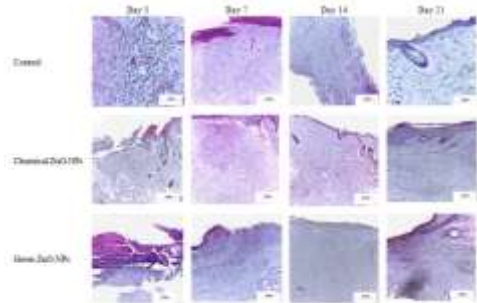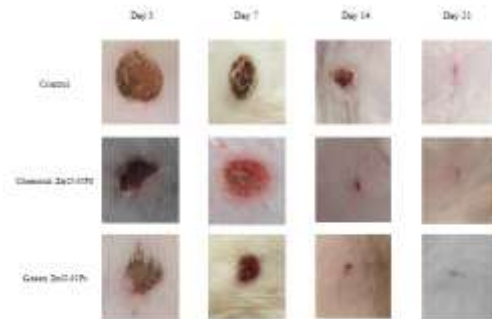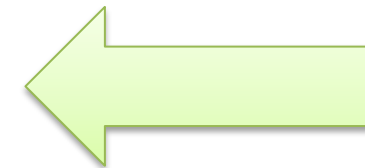

Supplement: Supplementary file 1 [file 56164d96faaee7a0943148dc.pdf]
